# Supplementary material for: Ruffling drives coproheme decarboxylation by facilitating PCET: a theoretical investigation of ChdC
Source: Royal Society of Chemistry journal article supplement (doi:10.1039/d0cp02690e), 2020-01-01
Supplement: d0cp02690e1.pdf [file d0cp02690e1.pdf]

## **Ruffling Drives Coproheme Decarboxylation by Facilitating PCET: A**

### **Theoretical Investigation of ChdC**

Ying Zhang,<sup>a</sup> Junkai Wang,<sup>a</sup> Chang Yuan,<sup>a</sup> Wei Liu,<sup>a</sup> Hongwei Tan,<sup>\*a</sup> Xichen Li<sup>a</sup> and Guangju Chen<sup>\*a</sup>

<sup>a</sup> Key Laboratory of Theoretical and Computational Photochemistry, College of Chemistry,

Beijing Normal University, Beijing 100875, China

Correspondence should be addressed to hongwei.tan@bnu.edu.cn, li\_xi\_chen@hotmail.com or  
gjchen@bnu.edu.cn\*

Supplementary Information

Supplementary Figure

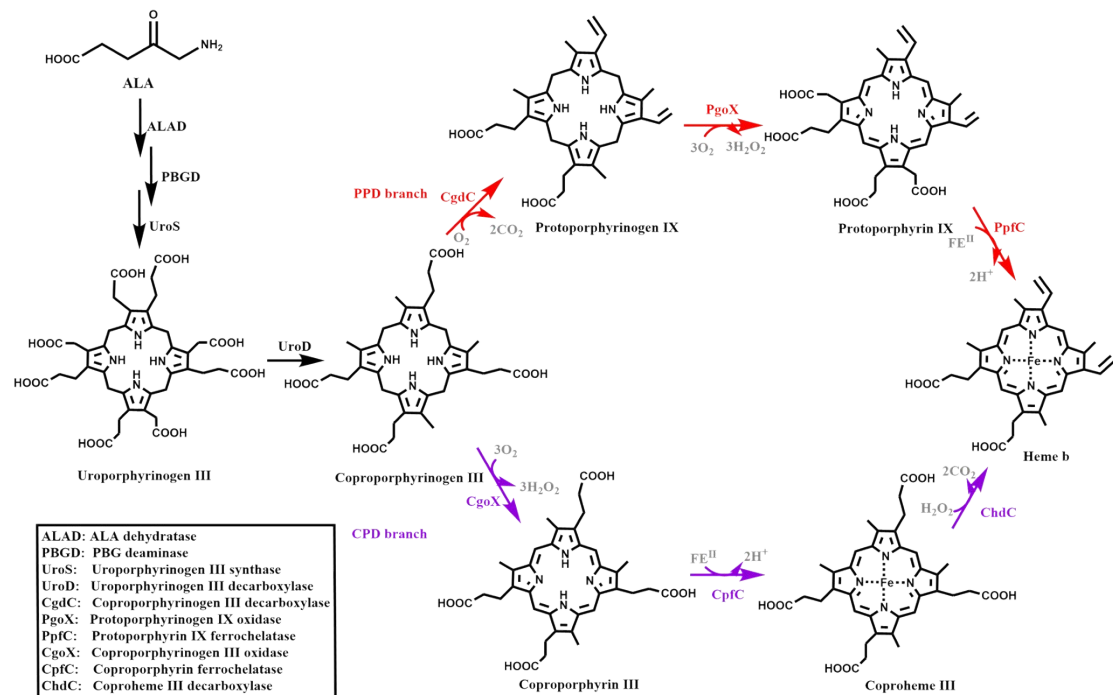

**Fig.S1** Heme b biosynthesis pathways (red: PPD branch; magenta: CPD branch)

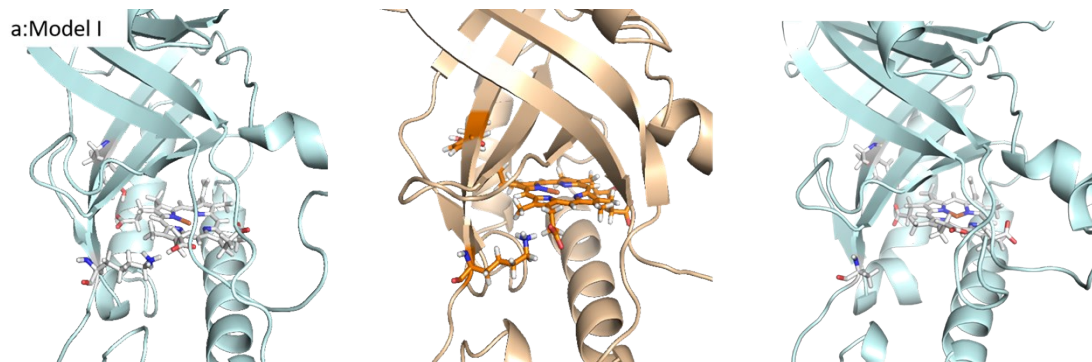

**Fig.S2** Three ChdC-hardroheme complex models for MD simulation (a: the hardroheme is rotated for 90° so that its p4 propionate is placed in the vicinity of Tyr145; b: the hardroheme maintains its orientation as that of coproheme in the crystal structure, c: mutation Lys149 of Model I to an alanine)

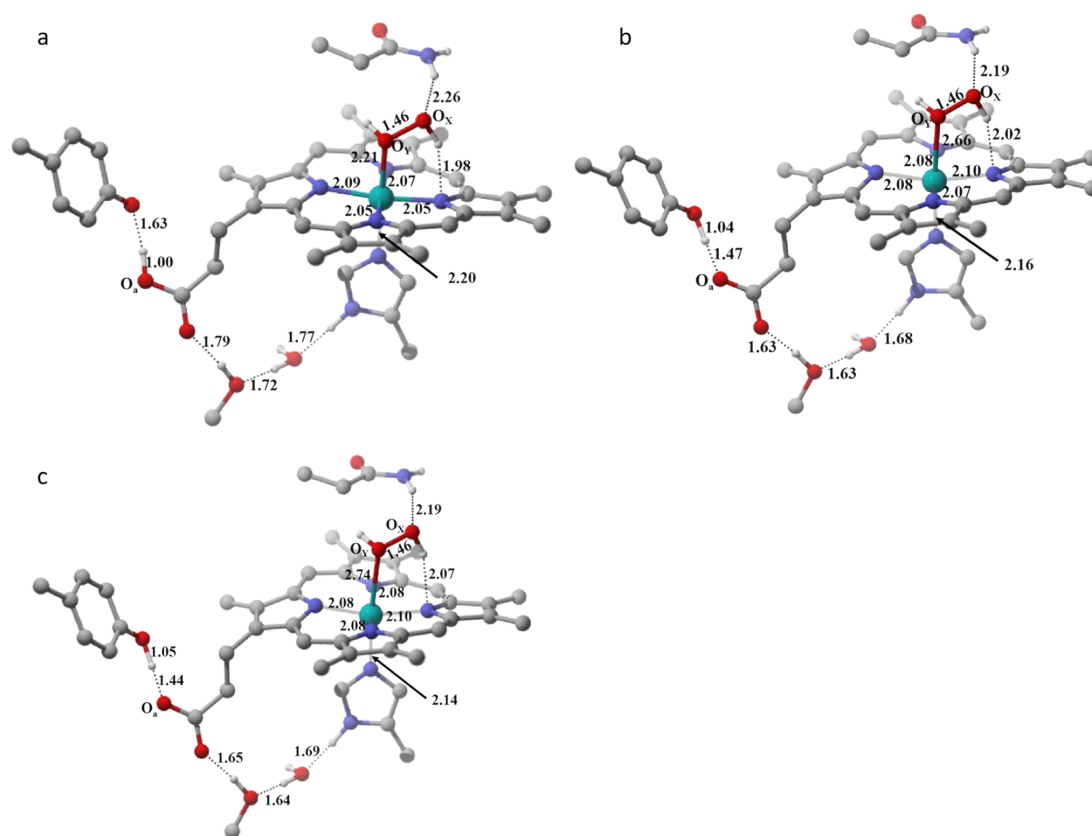

**Fig.S3** The optimized geometry structures of RE in different spin states, distances are labelled in Å (a: doublet, b: quartet, c: sextet)

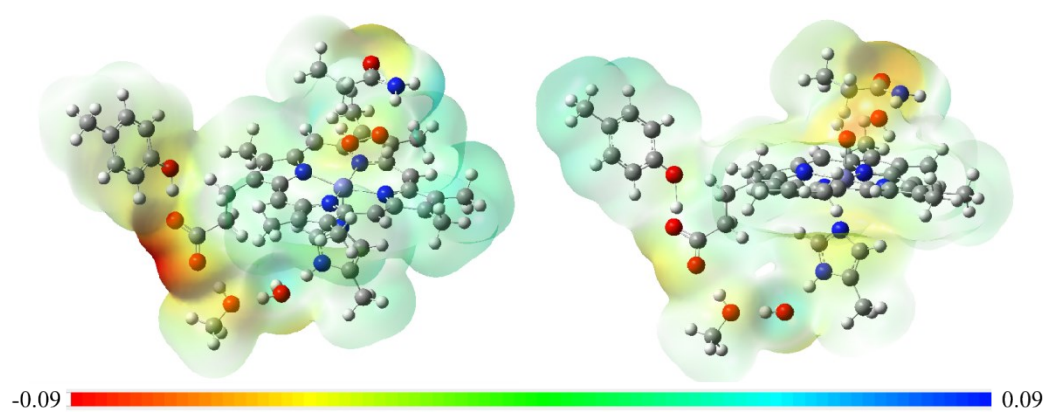

**Fig.S4** Electrostatic potential diagrams of  ${}^6\text{RE}$  and  ${}^6\text{TS1}$ .

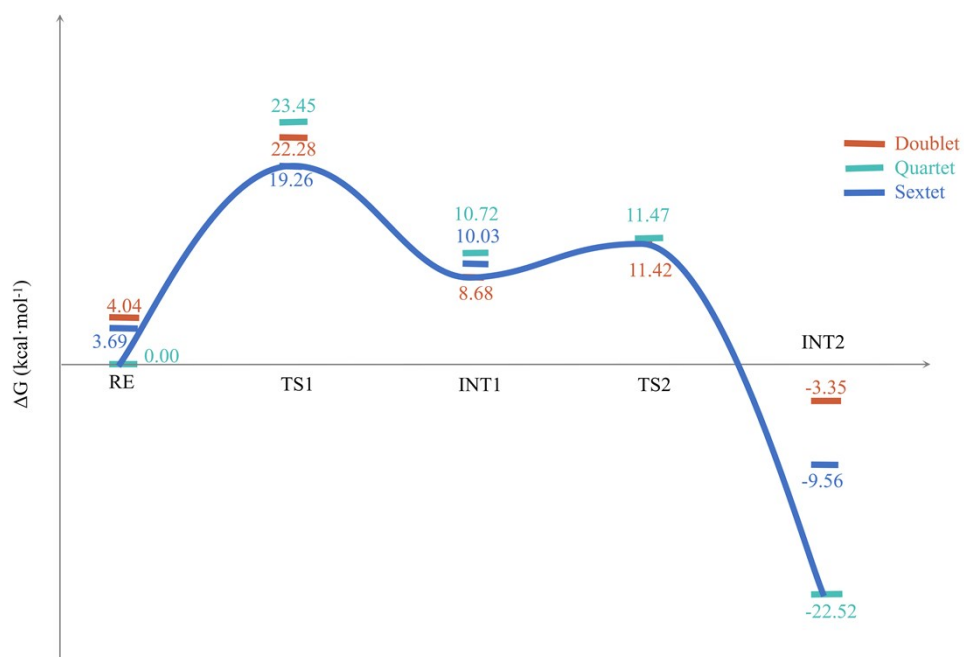

**Fig.S5** Energy profile of H<sub>2</sub>O<sub>2</sub> homolysis reaction in ChdC with coproheme in planar conformation.

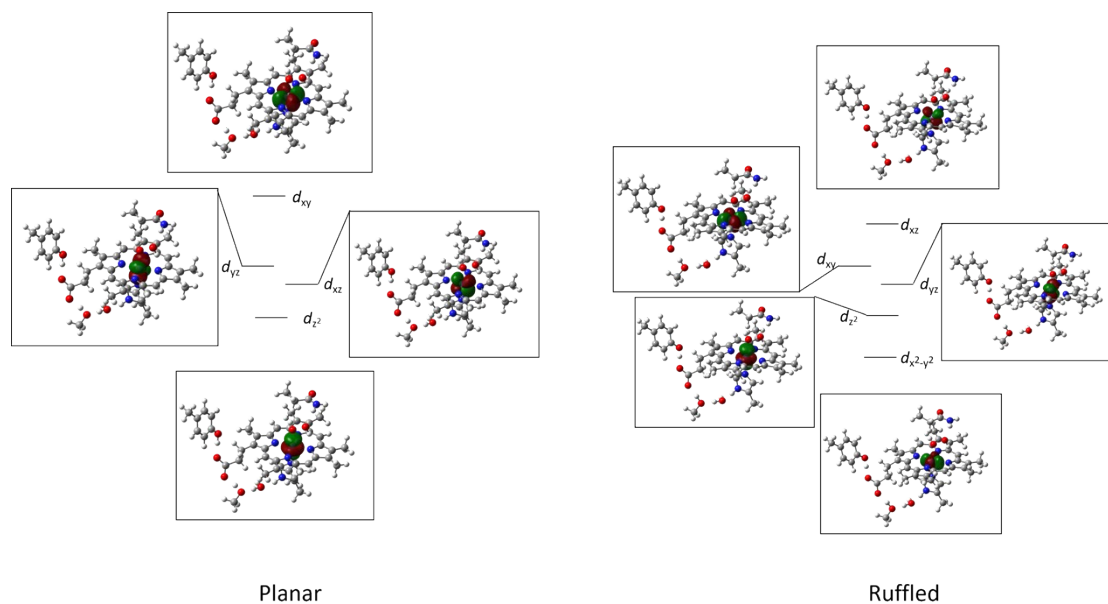

**Fig.S6** The *d* orbitals of the Fe<sup>III</sup> in <sup>4</sup>RE<sub>planar</sub> and <sup>6</sup>RE<sub>ruffled</sub>.

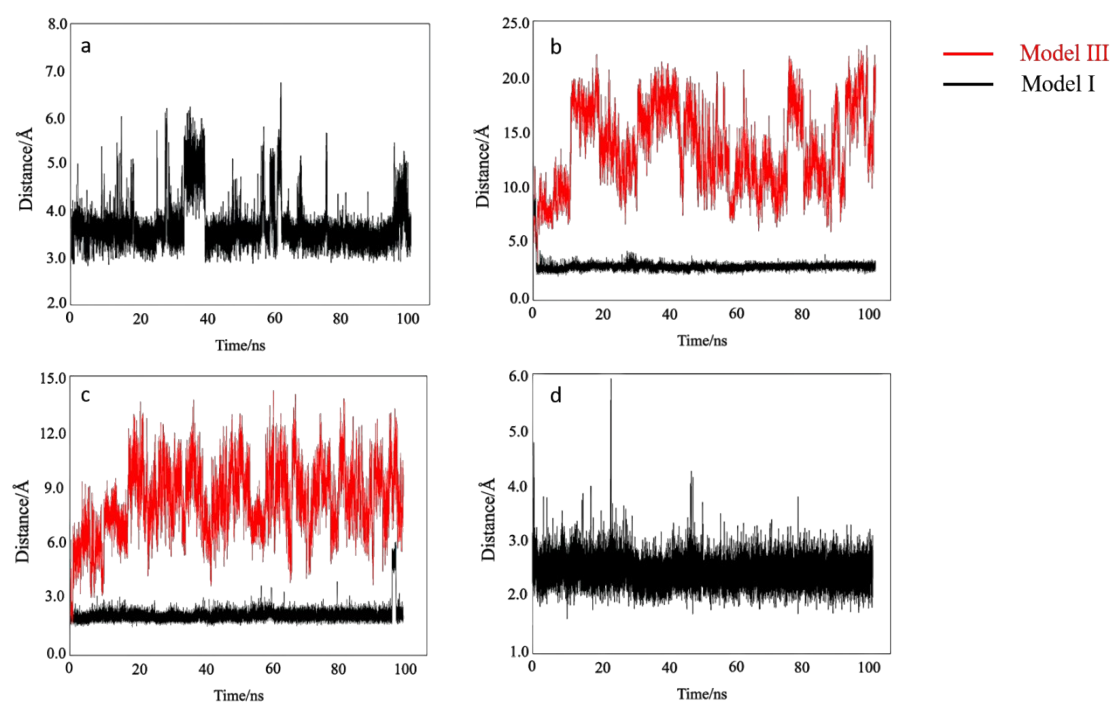

**Fig.S7** Some important interatomic distances during simulation (black: model I; red: model III) :  
a: the distance between ammonium N atom of Lys149 and C<sub>carboxyl</sub> of p6 propionate of model I;  
b: the distance between phenolic O atom of Tyr114 and C<sub>carboxyl</sub> of p6 propionate;  
c: the distance between hydroxyl O atom of Ser112 and C<sub>carboxyl</sub> of p6 propionate;  
d: the distance between phenolic O atom of Tyr145 and C<sub>carboxyl</sub> of p4 propionate of model I.

### Supplementary Table

**Table S1.** Relative free energy of the ChdC-coproheme-Fe<sup>III</sup> and ChdC-coproheme-Fe<sup>III</sup>-H<sub>2</sub>O<sub>2</sub> complexes in different spin states (kcal·mol<sup>-1</sup>).

| Complexes                                                  | Doublet(s=1/2) | Quartet(s=3/2) | Sextet (s=5/2) |
|------------------------------------------------------------|----------------|----------------|----------------|
| Coproheme-Fe <sup>III</sup>                                | 16.15          | 6.04           | 0.00           |
| Coproheme-Fe <sup>III</sup> -H <sub>2</sub> O <sub>2</sub> | 17.41          | 1.21           | 0.00           |

**Table S2.** The detailed Mulliken spin population of some important atoms and groups in the process of H<sub>2</sub>O<sub>2</sub> homolysis .

| Doublet (S =1/2)   |       |       |       |       |       |
|--------------------|-------|-------|-------|-------|-------|
|                    | RE    | TS1   | INT1  | TS2   | INT2  |
| Fe                 | 0.00  | +0.47 | +1.04 | +1.03 | +1.34 |
| O <sub>γ</sub> H   | 0.00  | -0.01 | +0.15 | +0.32 | +0.75 |
| O <sub>α</sub> H   | 0.00  | -0.41 | +0.91 | +0.72 |       |
| His171             | 0.00  | -0.01 | -0.01 | -0.01 | -0.02 |
| Tyr145             | +0.82 | +0.85 | -0.85 | -0.87 | -0.88 |
| Coproporphyrin III | +0.17 | +0.12 | -0.23 | -0.19 | -0.21 |
| Quartet (S =3/2)   |       |       |       |       |       |
|                    | RE    | TS1   | INT1  | TS2   | INT2  |

|                    |       |       |       |       |       |
|--------------------|-------|-------|-------|-------|-------|
| Fe                 | +3.16 | +2.76 | +2.84 | +2.83 | +3.37 |
| O <sub>γ</sub> H   | +0.01 | -0.05 | +0.43 | +0.74 | +0.43 |
| O <sub>χ</sub> H   | 0.00  | -0.39 | +0.81 | +0.51 |       |
| His171             | +0.09 | +0.04 | +0.03 | +0.03 | -0.02 |
| Tyr145             | -0.11 | +0.74 | -0.90 | -0.90 | -0.90 |
| Coproporphyrin III | -0.15 | +0.09 | -0.22 | -0.21 | +0.11 |
| Sextet (S =5/2)    |       |       |       |       |       |
|                    | RE    | TS1   | INT1  | TS2   | INT2  |
| Fe                 | +4.23 | +4.21 | +4.30 | +4.26 | +3.38 |
| O <sub>γ</sub> H   | +0.01 | 0.00  | +0.41 | +0.56 | +0.43 |
| O <sub>χ</sub> H   | 0.00  | -0.47 | +0.86 | +0.67 |       |
| His171             | +0.11 | +0.04 | +0.03 | +0.03 | -0.02 |
| Tyr145             | +0.09 | +0.85 | -0.88 | -0.90 | -0.90 |
| Coproporphyrin III | +0.56 | +0.38 | +0.29 | +0.37 | +0.31 |

**Table S3.** The detailed Mulliken spin population of some important atoms and groups in the process of β-hydrogen atom transfer and CO<sub>2</sub> release.



| Doublet (S =1/2)   |       |       |       |       |       |       |
|--------------------|-------|-------|-------|-------|-------|-------|
|                    | INT2  | TS3   | INT3  | INT4  | TS4   | PRO   |
| Fe                 | +1.34 | +1.29 | +1.29 | +1.02 | +1.02 | +1.02 |
| O <sub>y</sub>     | +0.75 | +0.80 | +0.79 | +0.08 | +0.08 | +0.07 |
| Tyr145             | -0.90 | -0.28 | -0.02 | 0.00  | 0.00  | 0.00  |
| His171             | -0.02 | -0.02 | -0.02 | -0.01 | -0.01 | -0.01 |
| β-C                | 0.00  | -0.37 | -0.64 | 0.00  | 0.00  | /     |
| Coproporphyrin III | -0.20 | -0.79 | -1.06 | -0.08 | -0.08 | -0.08 |
| Quartet (S =3/2)   |       |       |       |       |       |       |
|                    | INT2  | TS3   | INT3  | INT4  | TS4   | PRO   |
| Fe                 | +3.37 | +3.19 | +3.21 | +2.83 | +2.83 | +2.84 |
| O <sub>y</sub>     | +0.43 | +0.54 | +0.53 | +0.24 | +0.24 | +0.24 |
| Tyr145             | -0.88 | -0.29 | -0.02 | +0.01 | +0.01 | +0.01 |
| His171             | -0.02 | -0.01 | -0.02 | +0.04 | +0.03 | +0.03 |
| β-C                | -0.01 | -0.38 | -0.67 | 0.00  | 0.00  | /     |
| Coproporphyrin III | +0.11 | -0.44 | -0.72 | -0.12 | +0.12 | +0.12 |
| Sextet (S =5/2)    |       |       |       |       |       |       |
|                    | INT2  | TS3   | INT3  | INT4  | TS4   | PRO   |
| Fe                 | +3.38 | +3.35 | +3.36 | +4.30 | +4.30 | +4.30 |
| O <sub>y</sub>     | +0.43 | +0.45 | +0.45 | +0.27 | +0.27 | +0.26 |
| Tyr145             | +0.90 | +0.29 | +0.02 | 0.00  | +0.01 | +0.01 |
| His171             | -0.02 | -0.02 | -0.02 | +0.04 | +0.03 | +0.03 |

|                    |       |       |       |       |       |       |
|--------------------|-------|-------|-------|-------|-------|-------|
| $\beta$ -C         | +0.01 | +0.36 | +0.64 | 0.00  | 0.00  |       |
| Coproporphyrin III | +0.31 | +0.92 | +1.19 | +0.38 | +0.38 | +0.40 |

**Table S4.** The occupancies (%) of the hydrogen bonds along MD simulation trajectories of complex models.

|        | Model I |       |       | Model III |    |       |
|--------|---------|-------|-------|-----------|----|-------|
|        | P4      | P6    | P7    | P4        | P6 | P7    |
| ARG131 |         |       | 164.4 |           |    | 77.7  |
| GLN185 |         |       |       |           |    |       |
| LYS149 |         | 65.4  |       |           |    |       |
| TYR145 | 92.7    |       |       | 96.1      |    |       |
| ARG218 | 186.7   |       |       | 163.7     |    |       |
| SER223 | 5.7     |       |       | 97.2      |    |       |
| TYR114 |         | 88.5  |       |           |    | 3.7   |
| SER112 |         | 102.0 |       |           |    | 28.5  |
| SUM    | 285.1   | 255.9 | 164.4 | 357.0     | 0  | 109.9 |



|                                                   |           |            |            |           |            |            |           |
|---------------------------------------------------|-----------|------------|------------|-----------|------------|------------|-----------|
| <b>Cartesian coordinates of stationary points</b> | H         | -5.001533  | -23.498484 | 55.430485 |            |            |           |
| <b><sup>6</sup>RE</b>                             | H         | -7.033839  | -21.807156 | 52.602913 |            |            |           |
| C                                                 | -6.283003 | -15.849998 | 40.663002  | H         | -3.734818  | -24.452530 | 53.039299 |
| C                                                 | -6.731866 | -16.737881 | 41.796707  | H         | -6.026342  | -22.232298 | 50.312187 |
| C                                                 | -7.100718 | -18.078636 | 41.574566  | C         | -3.632989  | -26.329979 | 44.420998 |
| C                                                 | -6.853057 | -16.236094 | 43.103893  | C         | -2.842742  | -26.682720 | 45.673164 |
| C                                                 | -7.577860 | -18.877300 | 42.602673  | C         | -2.949149  | -28.158463 | 46.065392 |
| C                                                 | -7.326449 | -17.016159 | 44.151077  | O         | -3.818929  | -28.902794 | 45.627483 |
| C                                                 | -7.709443 | -18.355919 | 43.910614  | N         | -1.990708  | -28.568302 | 46.945652 |
| O                                                 | -8.190586 | -19.147114 | 44.870430  | H         | -3.579087  | -25.256201 | 44.218174 |
| H                                                 | -6.169522 | -14.816259 | 41.004063  | H         | -4.682079  | -26.609507 | 44.539467 |
| H                                                 | -7.029708 | -15.841610 | 39.858524  | H         | -1.783238  | -26.422413 | 45.557087 |
| H                                                 | -7.021329 | -18.493227 | 40.571949  | H         | -3.242914  | -26.115931 | 46.523388 |
| H                                                 | -6.577910 | -15.202287 | 43.299862  | H         | -1.411012  | -27.886084 | 47.418892 |
| H                                                 | -7.871446 | -19.907518 | 42.426857  | H         | -2.087888  | -29.491461 | 47.340725 |
| H                                                 | -7.427551 | -16.617558 | 45.155346  | C         | -9.383000  | -17.372021 | 52.378021 |
| H                                                 | -8.202920 | -18.661823 | 45.805660  | O         | -8.434927  | -18.314203 | 51.882328 |
| C                                                 | -5.863011 | -23.187992 | 54.833996  | H         | -10.174460 | -17.891459 | 52.934654 |
| C                                                 | -5.498567 | -23.153921 | 53.380154  | H         | -9.846892  | -16.819820 | 51.553844 |
| N                                                 | -6.220682 | -22.445154 | 52.435268  | H         | -8.302446  | -18.183638 | 50.902454 |
| C                                                 | -4.511232 | -23.797434 | 52.675190  | C         | -1.018206  | -28.208946 | 53.030575 |
| C                                                 | -5.666507 | -22.673510 | 51.229160  | C         | -1.117987  | -26.892973 | 52.336998 |
| N                                                 | -4.623995 | -23.494461 | 51.329952  | C         | -0.224008  | -25.726015 | 52.398991 |
| H                                                 | -6.187707 | -22.204580 | 55.187038  | C         | 1.049715   | -25.548849 | 53.155441 |

|   |           |            |           |   |           |            |           |
|---|-----------|------------|-----------|---|-----------|------------|-----------|
| C | -2.176033 | -26.434019 | 51.413006 | C | -3.405996 | -20.929014 | 48.467007 |
| C | -3.243002 | -27.334986 | 51.047993 | N | -4.270856 | -25.922266 | 49.272243 |
| N | -2.005984 | -25.184381 | 50.922791 | C | -4.165991 | -27.087019 | 49.946007 |
| C | -0.860967 | -24.739994 | 51.486019 | C | -5.220000 | -26.140026 | 48.332989 |
| C | -0.263016 | -23.437010 | 51.229988 | C | -5.778995 | -27.518000 | 48.344013 |
| N | -4.357965 | -23.225328 | 48.124573 | C | -6.748899 | -28.120220 | 47.386040 |
| C | -4.392003 | -21.856987 | 47.991001 | C | -5.045004 | -28.163984 | 49.439991 |
| C | -5.586002 | -21.422012 | 47.270996 | C | -5.149378 | -29.561056 | 49.951572 |
| O | -8.179803 | -17.951221 | 47.056248 | H | -0.143126 | -28.239294 | 53.685017 |
| C | -7.902352 | -18.402098 | 48.211876 | H | -1.900679 | -28.411421 | 53.649555 |
| O | -8.220315 | -17.848785 | 49.288498 | H | 1.003580  | -24.684263 | 53.828369 |
| C | -7.151106 | -19.753702 | 48.302040 | H | 1.902615  | -25.391062 | 52.483917 |
| C | -6.135961 | -20.039644 | 47.161629 | H | 1.270214  | -26.428989 | 53.765339 |
| C | -6.311984 | -22.663988 | 46.927006 | H | -3.264877 | -28.312031 | 51.511559 |
| C | -7.603382 | -22.798376 | 46.192581 | H | 0.678330  | -23.219122 | 51.718311 |
| C | -5.437017 | -23.750011 | 47.445992 | H | -6.649087 | -19.805428 | 49.273754 |
| C | -5.748992 | -25.167982 | 47.409008 | H | -7.915045 | -20.543116 | 48.300060 |
| N | -2.045482 | -22.493641 | 49.806301 | H | -6.640565 | -19.921997 | 46.199478 |
| C | -0.865991 | -22.387997 | 50.438019 | H | -5.337756 | -19.290163 | 47.190876 |
| C | -0.238013 | -21.044994 | 50.311989 | H | -7.848703 | -21.876753 | 45.656513 |
| C | 1.071519  | -20.612089 | 50.881107 | H | -8.436480 | -23.011900 | 46.875298 |
| C | -1.197991 | -20.294016 | 49.510014 | H | -7.568891 | -23.616577 | 45.464272 |
| C | -1.145882 | -18.879890 | 49.038406 | H | -6.560037 | -25.481062 | 46.764511 |
| C | -2.263007 | -21.284981 | 49.266979 | H | 1.276353  | -19.565826 | 50.639507 |

|    |           |            |           |             |           |            |           |
|----|-----------|------------|-----------|-------------|-----------|------------|-----------|
| H  | 1.902617  | -21.210262 | 50.488220 | H           | 1.090714  | -20.706688 | 51.973690 |
| H  | -1.118338 | -18.817436 | 47.944012 |             |           |            |           |
| H  | -0.254784 | -18.374214 | 49.419403 | <b>6TS1</b> |           |            |           |
| H  | -2.018310 | -18.307026 | 49.374619 | C           | -6.283002 | -15.850000 | 40.663002 |
| H  | -3.521174 | -19.892513 | 48.180317 | C           | -6.724055 | -16.760374 | 41.771770 |
| H  | -6.245326 | -28.376801 | 46.445683 | C           | -6.907877 | -18.148294 | 41.546085 |
| H  | -7.580729 | -27.445093 | 47.159092 | C           | -7.016621 | -16.238480 | 43.052608 |
| H  | -7.175671 | -29.041590 | 47.792484 | C           | -7.372606 | -18.977242 | 42.540451 |
| H  | -5.329831 | -29.588411 | 51.032822 | C           | -7.479354 | -17.042519 | 44.069870 |
| H  | -5.970443 | -30.093113 | 49.464500 | C           | -7.684377 | -18.455460 | 43.850937 |
| Fe | -3.352523 | -24.107885 | 49.717583 | O           | -8.114689 | -19.224771 | 44.772663 |
| O  | -8.359834 | -20.786045 | 52.803089 | H           | -6.177874 | -14.820757 | 41.016163 |
| H  | -4.232931 | -30.133677 | 49.760426 | H           | -7.029638 | -15.842801 | 39.857487 |
| H  | -3.251419 | -26.857357 | 43.571766 | H           | -6.682307 | -18.556040 | 40.563786 |
| H  | -8.338794 | -19.839367 | 52.476933 | H           | -6.875649 | -15.175480 | 43.229744 |
| H  | -9.181685 | -21.144442 | 52.448154 | H           | -7.521075 | -20.039894 | 42.377956 |
| O  | -1.384223 | -24.704596 | 47.903149 | H           | -7.706045 | -16.638721 | 45.051163 |
| H  | -1.940937 | -24.980190 | 47.155148 | H           | -8.258131 | -18.533678 | 46.256428 |
| O  | -0.808478 | -25.981030 | 48.304741 | C           | -5.862990 | -23.187996 | 54.834003 |
| H  | -1.133292 | -25.999386 | 49.226242 | C           | -5.486022 | -23.164574 | 53.373360 |
| H  | -0.925372 | -29.038635 | 52.318943 | N           | -6.250476 | -22.518805 | 52.416367 |
| H  | -8.909709 | -16.675350 | 53.037983 | C           | -4.461247 | -23.753553 | 52.664948 |
| H  | -5.355939 | -16.134197 | 40.210560 | C           | -5.674879 | -22.735121 | 51.208637 |
| H  | -6.656234 | -23.884270 | 55.009743 | N           | -4.586412 | -23.481915 | 51.312965 |

|   |            |            |           |   |           |            |           |
|---|------------|------------|-----------|---|-----------|------------|-----------|
| H | -6.191660  | -22.201595 | 55.176369 | C | 1.048471  | -25.551981 | 53.159748 |
| H | -5.003911  | -23.491447 | 55.437622 | C | -2.175943 | -26.434048 | 51.412922 |
| H | -7.079561  | -21.924063 | 52.585445 | C | -3.243025 | -27.334978 | 51.048031 |
| H | -3.646539  | -24.355915 | 53.038067 | N | -2.002294 | -25.190281 | 50.939758 |
| H | -6.069713  | -22.339893 | 50.284359 | C | -0.861058 | -24.739964 | 51.486073 |
| C | -3.633000  | -26.330000 | 44.421001 | C | -0.262973 | -23.437016 | 51.229969 |
| C | -2.828012  | -26.645315 | 45.670662 | N | -4.357705 | -23.222317 | 48.105709 |
| C | -2.929230  | -28.105976 | 46.115631 | C | -4.392126 | -21.856997 | 47.991116 |
| O | -3.770466  | -28.883324 | 45.670162 | C | -5.585943 | -21.422003 | 47.270950 |
| N | -2.007584  | -28.451197 | 47.054478 | O | -8.360021 | -17.936356 | 47.056080 |
| H | -3.603680  | -25.257504 | 44.202496 | C | -7.931246 | -18.442987 | 48.206863 |
| H | -4.676149  | -26.627649 | 44.551601 | O | -8.094029 | -17.807541 | 49.240383 |
| H | -1.770389  | -26.385590 | 45.544018 | C | -7.280251 | -19.818892 | 48.186192 |
| H | -3.209196  | -26.051798 | 46.507595 | C | -6.135479 | -20.032335 | 47.156101 |
| H | -1.452178  | -27.723652 | 47.506142 | C | -6.312044 | -22.663998 | 46.927052 |
| H | -2.107991  | -29.355621 | 47.489513 | C | -7.597875 | -22.813700 | 46.180923 |
| C | -9.382999  | -17.371990 | 52.377995 | C | -5.436889 | -23.750019 | 47.445862 |
| O | -8.442206  | -18.338921 | 51.915699 | C | -5.749057 | -25.167982 | 47.409065 |
| H | -10.190509 | -17.873287 | 52.926037 | N | -2.046848 | -22.482035 | 49.820896 |
| H | -9.825716  | -16.820438 | 51.541676 | C | -0.866007 | -22.387997 | 50.438004 |
| H | -8.290830  | -18.208530 | 50.957256 | C | -0.237998 | -21.044998 | 50.312004 |
| C | -1.014049  | -28.208128 | 53.032356 | C | 1.071142  | -20.611120 | 50.881840 |
| C | -1.118019  | -26.892984 | 52.337025 | C | -1.198004 | -20.293999 | 49.510006 |
| C | -0.223979  | -25.726013 | 52.398975 | C | -1.143991 | -18.878731 | 49.040878 |

|   |           |            |           |    |           |            |           |
|---|-----------|------------|-----------|----|-----------|------------|-----------|
| C | -2.263006 | -21.285002 | 49.266987 | H  | 1.299168  | -19.579170 | 50.600708 |
| C | -3.405948 | -20.928995 | 48.466965 | H  | 1.897171  | -21.239574 | 50.527225 |
| N | -4.282325 | -25.927258 | 49.272377 | H  | -1.166055 | -18.810396 | 47.946411 |
| C | -4.166012 | -27.087000 | 49.946011 | H  | -0.227448 | -18.389338 | 49.381737 |
| C | -5.219979 | -26.140011 | 48.332989 | H  | -1.989359 | -18.290552 | 49.419666 |
| C | -5.778999 | -27.517998 | 48.343998 | H  | -3.510845 | -19.892689 | 48.175159 |
| C | -6.737951 | -28.127131 | 47.379158 | H  | -6.219831 | -28.393019 | 46.449089 |
| C | -5.044990 | -28.164001 | 49.439991 | H  | -7.565555 | -27.452866 | 47.133320 |
| C | -5.145630 | -29.564697 | 49.942619 | H  | -7.172287 | -29.044538 | 47.787716 |
| H | -0.155859 | -28.225100 | 53.709812 | H  | -5.276389 | -29.601574 | 51.030716 |
| H | -1.908936 | -28.426418 | 53.627785 | H  | -5.995621 | -30.081045 | 49.488464 |
| H | 1.009880  | -24.677065 | 53.819847 | Fe | -3.153623 | -24.210958 | 49.512535 |
| H | 1.908036  | -25.414207 | 52.491852 | O  | -8.464520 | -20.864981 | 52.883438 |
| H | 1.256101  | -26.425558 | 53.784023 | H  | -4.247450 | -30.148449 | 49.703228 |
| H | -3.264666 | -28.312712 | 51.510334 | H  | -3.251409 | -26.857342 | 43.571766 |
| H | 0.682845  | -23.222630 | 51.711292 | H  | -8.409833 | -19.934809 | 52.550301 |
| H | -6.910983 | -20.012808 | 49.195660 | H  | -9.300406 | -21.201733 | 52.540833 |
| H | -8.071468 | -20.551432 | 47.982597 | O  | -1.745753 | -24.632269 | 48.149715 |
| H | -6.519498 | -19.866428 | 46.146118 | H  | -2.029168 | -24.752045 | 47.231194 |
| H | -5.353756 | -19.284620 | 47.327148 | O  | -0.659652 | -26.050570 | 48.140373 |
| H | -7.854370 | -21.896257 | 45.642208 | H  | -0.683260 | -26.076889 | 49.111752 |
| H | -8.436469 | -23.053843 | 46.848866 | H  | -0.888638 | -29.036203 | 52.323586 |
| H | -7.540697 | -23.624353 | 45.445084 | H  | -8.909712 | -16.675375 | 53.038006 |
| H | -6.561715 | -25.481323 | 46.766594 | H  | -5.355942 | -16.134195 | 40.210564 |



|              |           |            |           |   |            |            |           |
|--------------|-----------|------------|-----------|---|------------|------------|-----------|
| H            | -6.656248 | -23.884268 | 55.009739 | N | -4.546762  | -23.533138 | 51.329117 |
| H            | 1.074468  | -20.660690 | 51.978016 | H | -6.198457  | -22.197453 | 55.157658 |
|              |           |            |           | H | -5.010253  | -23.479519 | 55.452290 |
| <b>°INT1</b> |           |            |           | H | -7.081796  | -22.000080 | 52.546577 |
| C            | -6.283009 | -15.849998 | 40.663002 | H | -3.601348  | -24.344475 | 53.081844 |
| C            | -6.720015 | -16.751762 | 41.779999 | H | -6.049284  | -22.450380 | 50.265327 |
| C            | -6.887299 | -18.144524 | 41.569996 | C | -3.632992  | -26.329973 | 44.421009 |
| C            | -7.026117 | -16.216255 | 43.052570 | C | -2.751799  | -26.634731 | 45.627682 |
| C            | -7.349876 | -18.965614 | 42.571449 | C | -2.918209  | -28.062256 | 46.139698 |
| C            | -7.486546 | -17.012115 | 44.076767 | O | -3.845320  | -28.798418 | 45.796452 |
| C            | -7.675270 | -18.429998 | 43.873466 | N | -1.952172  | -28.462027 | 47.011890 |
| O            | -8.102551 | -19.191359 | 44.802128 | H | -3.629331  | -25.258654 | 44.195824 |
| H            | -6.181454 | -14.817265 | 41.006794 | H | -4.661465  | -26.654816 | 44.592548 |
| H            | -7.031583 | -15.852773 | 39.859203 | H | -1.694447  | -26.470613 | 45.387192 |
| H            | -6.650518 | -18.561771 | 40.594452 | H | -2.953064  | -25.954168 | 46.458950 |
| H            | -6.896675 | -15.149807 | 43.216831 | H | -1.298707  | -27.796324 | 47.429413 |
| H            | -7.485933 | -20.031771 | 42.421757 | H | -2.093666  | -29.355968 | 47.457867 |
| H            | -7.721366 | -16.599953 | 45.052704 | C | -9.383005  | -17.371979 | 52.377975 |
| H            | -8.236790 | -18.487726 | 46.300945 | O | -8.459637  | -18.356915 | 51.921005 |
| C            | -5.862984 | -23.187994 | 54.834003 | H | -10.189055 | -17.870907 | 52.928196 |
| C            | -5.469430 | -23.187485 | 53.376629 | H | -9.827467  | -16.824026 | 51.539673 |
| N            | -6.240788 | -22.581745 | 52.399609 | H | -8.169849  | -18.140562 | 51.012344 |
| C            | -4.426043 | -23.769138 | 52.688011 | C | -1.014081  | -28.209017 | 53.029812 |
| C            | -5.651132 | -22.814476 | 51.200836 | C | -1.118013  | -26.892948 | 52.337017 |

|   |           |            |           |   |           |            |           |
|---|-----------|------------|-----------|---|-----------|------------|-----------|
| C | -0.223991 | -25.726034 | 52.398979 | C | -1.150109 | -18.876572 | 49.047764 |
| C | 1.051071  | -25.552029 | 53.154720 | C | -2.263024 | -21.284971 | 49.266949 |
| C | -2.175910 | -26.434044 | 51.412945 | C | -3.405942 | -20.929020 | 48.466976 |
| C | -3.243053 | -27.334955 | 51.048027 | N | -4.284734 | -25.925322 | 49.278351 |
| N | -2.002831 | -25.187819 | 50.939777 | C | -4.165987 | -27.087042 | 49.946037 |
| C | -0.861073 | -24.739992 | 51.486038 | C | -5.220000 | -26.140011 | 48.332947 |
| C | -0.262984 | -23.437006 | 51.229977 | C | -5.778987 | -27.518003 | 48.344032 |
| N | -4.368980 | -23.219473 | 48.123936 | C | -6.730429 | -28.126715 | 47.373554 |
| C | -4.392126 | -21.856968 | 47.991138 | C | -5.044998 | -28.163979 | 49.439960 |
| C | -5.585960 | -21.422033 | 47.270931 | C | -5.139080 | -29.566454 | 49.937508 |
| O | -8.308964 | -17.885082 | 47.096432 | H | -0.137524 | -28.238098 | 53.682671 |
| C | -7.855290 | -18.397591 | 48.237095 | H | -1.895253 | -28.414103 | 53.650002 |
| O | -7.955345 | -17.748573 | 49.269203 | H | 1.007876  | -24.690287 | 53.831909 |
| C | -7.252451 | -19.795116 | 48.198841 | H | 1.903605  | -25.393356 | 52.482758 |
| C | -6.127154 | -20.031452 | 47.150749 | H | 1.271881  | -26.435072 | 53.760738 |
| C | -6.312009 | -22.663977 | 46.927052 | H | -3.260498 | -28.314697 | 51.505985 |
| C | -7.592825 | -22.814098 | 46.172714 | H | 0.679060  | -23.219275 | 51.716831 |
| C | -5.436918 | -23.750038 | 47.445862 | H | -6.876324 | -20.009377 | 49.201519 |
| C | -5.749046 | -25.167973 | 47.409084 | H | -8.067802 | -20.501322 | 47.997646 |
| N | -2.039673 | -22.492632 | 49.796558 | H | -6.529402 | -19.874319 | 46.145840 |
| C | -0.865980 | -22.388008 | 50.438030 | H | -5.336406 | -19.288340 | 47.298504 |
| C | -0.238026 | -21.044985 | 50.311981 | H | -7.855513 | -21.890663 | 45.647575 |
| C | 1.066670  | -20.609819 | 50.890739 | H | -8.431663 | -23.072868 | 46.833000 |
| C | -1.197985 | -20.294022 | 49.510029 | H | -7.523235 | -23.612053 | 45.424324 |

|    |           |            |           |             |           |            |           |
|----|-----------|------------|-----------|-------------|-----------|------------|-----------|
| H  | -6.553949 | -25.484121 | 46.758831 | H           | -5.355935 | -16.134199 | 40.210564 |
| H  | 1.281585  | -19.568577 | 50.635120 | H           | -6.656251 | -23.884270 | 55.009739 |
| H  | 1.899824  | -21.219465 | 50.520290 | H           | 1.070751  | -20.687384 | 51.984970 |
| H  | -1.148531 | -18.804613 | 47.953300 |             |           |            |           |
| H  | -0.247768 | -18.377623 | 49.411556 | <b>6TS2</b> |           |            |           |
| H  | -2.011546 | -18.301634 | 49.409443 | C           | -6.283006 | -15.850000 | 40.663002 |
| H  | -3.513118 | -19.892191 | 48.178516 | C           | -6.720283 | -16.753025 | 41.778622 |
| H  | -6.196291 | -28.384483 | 46.450466 | C           | -6.884450 | -18.146255 | 41.566929 |
| H  | -7.558737 | -27.454639 | 47.124378 | C           | -7.029441 | -16.218330 | 43.051182 |
| H  | -7.162567 | -29.047560 | 47.776455 | C           | -7.347458 | -18.968695 | 42.566620 |
| H  | -5.265152 | -29.608667 | 51.025959 | C           | -7.490240 | -17.015429 | 44.073822 |
| H  | -5.989119 | -30.082899 | 49.483864 | C           | -7.676327 | -18.433943 | 43.868706 |
| Fe | -3.092956 | -24.246708 | 49.411663 | O           | -8.104029 | -19.195911 | 44.795498 |
| O  | -8.500544 | -20.943859 | 52.737946 | H           | -6.181580 | -14.817630 | 41.007744 |
| H  | -4.239901 | -30.144762 | 49.689781 | H           | -7.031555 | -15.852427 | 39.859180 |
| H  | -3.251411 | -26.857361 | 43.571762 | H           | -6.644673 | -18.562073 | 40.591564 |
| H  | -8.438960 | -19.996078 | 52.467167 | H           | -6.901768 | -15.151812 | 43.216042 |
| H  | -9.305756 | -21.268787 | 52.319309 | H           | -7.481193 | -20.035053 | 42.416435 |
| O  | -1.870959 | -24.816666 | 48.067890 | H           | -7.727310 | -16.604929 | 45.049927 |
| H  | -1.108441 | -24.251177 | 47.888508 | H           | -8.239456 | -18.491692 | 46.303787 |
| O  | -0.221204 | -26.488066 | 48.398472 | C           | -5.862984 | -23.187992 | 54.834003 |
| H  | -0.780261 | -26.392408 | 49.191463 | C           | -5.470954 | -23.190132 | 53.377769 |
| H  | -0.920617 | -29.037502 | 52.316990 | N           | -6.242893 | -22.588306 | 52.399487 |
| H  | -8.909708 | -16.675383 | 53.038025 | C           | -4.429298 | -23.776239 | 52.690750 |

|   |            |            |           |   |           |            |           |
|---|------------|------------|-----------|---|-----------|------------|-----------|
| C | -5.653431  | -22.827963 | 51.201115 | C | -1.118012 | -26.892963 | 52.337029 |
| N | -4.550433  | -23.547371 | 51.331497 | C | -0.223990 | -25.726028 | 52.398972 |
| H | -6.198551  | -22.197437 | 55.157711 | C | 1.047023  | -25.549318 | 53.161091 |
| H | -5.010346  | -23.479435 | 55.452557 | C | -2.175942 | -26.434072 | 51.412914 |
| H | -7.082701  | -22.005560 | 52.545197 | C | -3.243029 | -27.334963 | 51.048027 |
| H | -3.604997  | -24.350170 | 53.087868 | N | -1.996527 | -25.189631 | 50.932102 |
| H | -6.052937  | -22.467623 | 50.264610 | C | -0.861050 | -24.739946 | 51.486088 |
| C | -3.632996  | -26.329988 | 44.421001 | C | -0.262982 | -23.437021 | 51.229958 |
| C | -2.806413  | -26.717108 | 45.643787 | N | -4.363479 | -23.220797 | 48.118973 |
| C | -3.041181  | -28.159521 | 46.081936 | C | -4.392134 | -21.856987 | 47.991131 |
| O | -3.978846  | -28.845703 | 45.671474 | C | -5.585949 | -21.422018 | 47.270947 |
| N | -2.119650  | -28.635859 | 46.965145 | O | -8.310773 | -17.887035 | 47.096119 |
| H | -3.562906  | -25.255070 | 44.228149 | C | -7.855092 | -18.397438 | 48.237885 |
| H | -4.682356  | -26.603588 | 44.551277 | O | -7.953091 | -17.745369 | 49.267879 |
| H | -1.736810  | -26.581112 | 45.444263 | C | -7.253120 | -19.795181 | 48.200832 |
| H | -3.012691  | -26.061934 | 46.494526 | C | -6.127447 | -20.031290 | 47.153069 |
| H | -1.477867  | -28.003895 | 47.447285 | C | -6.312032 | -22.663986 | 46.927052 |
| H | -2.313646  | -29.541044 | 47.366802 | C | -7.594455 | -22.815145 | 46.175846 |
| C | -9.383001  | -17.371994 | 52.377995 | C | -5.436890 | -23.750027 | 47.445850 |
| O | -8.459761  | -18.356668 | 51.920414 | C | -5.749055 | -25.167978 | 47.409077 |
| H | -10.188335 | -17.871555 | 52.928627 | N | -2.045175 | -22.488523 | 49.804436 |
| H | -9.828435  | -16.824020 | 51.540176 | C | -0.865991 | -22.388002 | 50.438015 |
| H | -8.167520  | -18.138313 | 51.013229 | C | -0.238012 | -21.044991 | 50.311993 |
| C | -1.020252  | -28.203987 | 53.040970 | C | 1.069856  | -20.612436 | 50.884811 |

|   |           |            |           |    |           |            |           |
|---|-----------|------------|-----------|----|-----------|------------|-----------|
| C | -1.197992 | -20.294010 | 49.510017 | H  | -7.525090 | -23.611521 | 45.425732 |
| C | -1.147576 | -18.879177 | 49.041470 | H  | -6.554611 | -25.483913 | 46.759373 |
| C | -2.263018 | -21.284988 | 49.266979 | H  | 1.279259  | -19.567514 | 50.639866 |
| C | -3.405938 | -20.929007 | 48.466957 | H  | 1.901429  | -21.214893 | 50.499084 |
| N | -4.287591 | -25.926699 | 49.278893 | H  | -1.139904 | -18.813847 | 47.946522 |
| C | -4.166004 | -27.087015 | 49.946026 | H  | -0.247112 | -18.378403 | 49.407372 |
| C | -5.219991 | -26.140009 | 48.332973 | H  | -2.011080 | -18.302046 | 49.395065 |
| C | -5.778986 | -27.518005 | 48.344013 | H  | -3.512135 | -19.892502 | 48.176823 |
| C | -6.745938 | -28.122643 | 47.385544 | H  | -6.229571 | -28.383163 | 46.453205 |
| C | -5.045000 | -28.163988 | 49.439976 | H  | -7.574970 | -27.446306 | 47.150387 |
| C | -5.142329 | -29.565912 | 49.939026 | H  | -7.176869 | -29.041300 | 47.794827 |
| H | -0.123511 | -28.245724 | 53.665012 | H  | -5.270632 | -29.606955 | 51.027302 |
| H | -1.884726 | -28.381561 | 53.692516 | H  | -5.992317 | -30.081726 | 49.484524 |
| H | 0.990287  | -24.701239 | 53.854427 | Fe | -3.067275 | -24.245876 | 49.382229 |
| H | 1.898968  | -25.365791 | 52.494850 | O  | -8.504635 | -20.945171 | 52.736347 |
| H | 1.278461  | -26.440390 | 53.751156 | H  | -4.243575 | -30.146698 | 49.694630 |
| H | -3.263412 | -28.313145 | 51.509472 | H  | -3.251412 | -26.857349 | 43.571766 |
| H | 0.678823  | -23.218494 | 51.717075 | H  | -8.440877 | -19.997494 | 52.466572 |
| H | -6.877521 | -20.009398 | 49.203674 | H  | -9.308360 | -21.268703 | 52.313793 |
| H | -8.068521 | -20.501236 | 47.999325 | O  | -1.853822 | -24.706558 | 48.023914 |
| H | -6.528886 | -19.873383 | 46.147949 | H  | -1.010763 | -25.222540 | 48.164394 |
| H | -5.336650 | -19.288403 | 47.301476 | O  | -0.512335 | -26.674116 | 48.468048 |
| H | -7.860061 | -21.891369 | 45.652863 | H  | -0.821110 | -26.814825 | 49.381718 |
| H | -8.431069 | -23.076752 | 46.837822 | H  | -0.969660 | -29.042845 | 52.336185 |

|              |           |            |           |   |            |            |           |
|--------------|-----------|------------|-----------|---|------------|------------|-----------|
| H            | -8.909710 | -16.675371 | 53.038010 | C | -4.402774  | -23.812416 | 52.688595 |
| H            | -5.355938 | -16.134195 | 40.210564 | C | -5.611867  | -22.853432 | 51.186436 |
| H            | -6.656253 | -23.884270 | 55.009739 | N | -4.513487  | -23.583027 | 51.322212 |
| H            | 1.084196  | -20.703199 | 51.978050 | H | -6.206826  | -22.190720 | 55.124630 |
|              |           |            |           | H | -5.017711  | -23.461407 | 55.470093 |
| <b>2INT2</b> |           |            |           | H | -7.037797  | -22.016134 | 52.518631 |
| C            | -6.283005 | -15.850000 | 40.663002 | H | -3.584378  | -24.392216 | 53.087872 |
| C            | -6.718882 | -16.749853 | 41.781910 | H | -6.001409  | -22.491484 | 50.247009 |
| C            | -6.887400 | -18.142773 | 41.574219 | C | -3.633001  | -26.329996 | 44.421001 |
| C            | -7.022775 | -16.212261 | 43.054081 | C | -2.852317  | -26.758167 | 45.662777 |
| C            | -7.349221 | -18.962025 | 42.577545 | C | -3.107075  | -28.218863 | 46.034409 |
| C            | -7.482348 | -17.006298 | 44.080090 | O | -4.056027  | -28.864750 | 45.585716 |
| C            | -7.672520 | -18.424194 | 43.879055 | N | -2.199116  | -28.754110 | 46.893917 |
| O            | -8.099182 | -19.183916 | 44.809544 | H | -3.526798  | -25.255054 | 44.245880 |
| H            | -6.181998 | -14.816542 | 41.004791 | H | -4.692798  | -26.572878 | 44.523308 |
| H            | -7.031951 | -15.854783 | 39.859558 | H | -1.775811  | -26.612217 | 45.513088 |
| H            | -6.652179 | -18.561668 | 40.599007 | H | -3.113715  | -26.136120 | 46.525078 |
| H            | -6.892222 | -15.145686 | 43.216633 | H | -1.524220  | -28.172714 | 47.397984 |
| H            | -7.486162 | -20.028316 | 42.429672 | H | -2.400287  | -29.682949 | 47.233292 |
| H            | -7.715266 | -16.592472 | 45.055779 | C | -9.383001  | -17.371992 | 52.377991 |
| H            | -8.229704 | -18.478548 | 46.305191 | O | -8.461342  | -18.360006 | 51.923656 |
| C            | -5.862984 | -23.187992 | 54.834003 | H | -10.191532 | -17.868137 | 52.927135 |
| C            | -5.445819 | -23.215891 | 53.371014 | H | -9.824398  | -16.824493 | 51.537857 |
| N            | -6.202832 | -22.609716 | 52.380779 | H | -8.165302  | -18.142107 | 51.017227 |

|   |           |            |           |   |           |            |           |
|---|-----------|------------|-----------|---|-----------|------------|-----------|
| C | -1.026334 | -28.204279 | 53.041584 | C | 1.071298  | -20.616928 | 50.884872 |
| C | -1.118014 | -26.892967 | 52.337029 | C | -1.197995 | -20.294006 | 49.510017 |
| C | -0.223987 | -25.726027 | 52.398972 | C | -1.150702 | -18.879395 | 49.039814 |
| C | 1.050076  | -25.546417 | 53.154671 | C | -2.263015 | -21.284992 | 49.266979 |
| C | -2.175941 | -26.434067 | 51.412914 | C | -3.405940 | -20.929003 | 48.466961 |
| C | -3.243029 | -27.334965 | 51.048031 | N | -4.287518 | -25.908745 | 49.290836 |
| N | -2.013964 | -25.177782 | 50.933590 | C | -4.166006 | -27.087011 | 49.946022 |
| C | -0.861053 | -24.739950 | 51.486084 | C | -5.219987 | -26.140009 | 48.332973 |
| C | -0.262979 | -23.437019 | 51.229961 | C | -5.778989 | -27.518003 | 48.344009 |
| N | -4.383384 | -23.223164 | 48.173470 | C | -6.750836 | -28.115217 | 47.385387 |
| C | -4.392133 | -21.856989 | 47.991131 | C | -5.044997 | -28.163992 | 49.439980 |
| C | -5.585948 | -21.422016 | 47.270943 | C | -5.135411 | -29.564594 | 49.943516 |
| O | -8.299898 | -17.877310 | 47.102299 | H | -0.121720 | -28.253126 | 53.653572 |
| C | -7.847794 | -18.394354 | 48.241268 | H | -1.883745 | -28.371536 | 53.705132 |
| O | -7.947782 | -17.749025 | 49.275845 | H | 0.996588  | -24.696724 | 53.846149 |
| C | -7.247381 | -19.792837 | 48.198700 | H | 1.898569  | -25.365471 | 52.483562 |
| C | -6.121707 | -20.029367 | 47.150734 | H | 1.282912  | -26.436583 | 53.745476 |
| C | -6.312034 | -22.663988 | 46.927055 | H | -3.260135 | -28.315264 | 51.505356 |
| C | -7.584216 | -22.820936 | 46.159611 | H | 0.683543  | -23.222626 | 51.709923 |
| C | -5.436889 | -23.750025 | 47.445854 | H | -6.872836 | -20.011030 | 49.201111 |
| C | -5.749057 | -25.167978 | 47.409073 | H | -8.063966 | -20.496820 | 47.994675 |
| N | -2.057728 | -22.499313 | 49.811836 | H | -6.522935 | -19.869555 | 46.145866 |
| C | -0.865995 | -22.388000 | 50.438011 | H | -5.328937 | -19.289110 | 47.300705 |
| C | -0.238009 | -21.044992 | 50.311996 | H | -7.857734 | -21.891031 | 45.651890 |

|    |           |            |           |                        |           |            |           |
|----|-----------|------------|-----------|------------------------|-----------|------------|-----------|
| H  | -8.423503 | -23.108723 | 46.806980 | H                      | -0.993299 | -29.045408 | 52.338650 |
| H  | -7.494195 | -23.600855 | 45.394444 | H                      | -8.909710 | -16.675373 | 53.038010 |
| H  | -6.541404 | -25.487955 | 46.745129 | H                      | -5.355939 | -16.134195 | 40.210564 |
| H  | 1.279876  | -19.571001 | 50.643623 | H                      | -6.656253 | -23.884270 | 55.009735 |
| H  | 1.901706  | -21.217812 | 50.494453 | H                      | 1.087691  | -20.712250 | 51.977558 |
| H  | -1.136877 | -18.814413 | 47.944996 |                        |           |            |           |
| H  | -0.253248 | -18.376802 | 49.410576 | <b><sup>2</sup>TS3</b> |           |            |           |
| H  | -2.017092 | -18.304201 | 49.388977 | C                      | -6.283005 | -15.850000 | 40.663002 |
| H  | -3.503699 | -19.895311 | 48.163715 | C                      | -6.519239 | -16.748356 | 41.864620 |
| H  | -6.244193 | -28.361826 | 46.444099 | C                      | -6.496862 | -18.148155 | 41.724380 |
| H  | -7.586760 | -27.440916 | 47.169411 | C                      | -6.734042 | -16.230343 | 43.149250 |
| H  | -7.171552 | -29.041189 | 47.788532 | C                      | -6.707537 | -18.994942 | 42.808590 |
| H  | -5.290915 | -29.602911 | 51.028454 | C                      | -6.946495 | -17.063148 | 44.247108 |
| H  | -5.967236 | -30.092360 | 49.469685 | C                      | -6.964270 | -18.460220 | 44.083805 |
| Fe | -3.135222 | -24.228371 | 49.494774 | O                      | -7.336371 | -19.284536 | 45.106354 |
| O  | -8.442844 | -20.954077 | 52.720081 | H                      | -6.227659 | -14.797014 | 40.949909 |
| H  | -4.222997 | -30.133928 | 49.724503 | H                      | -7.074301 | -15.960139 | 39.912880 |
| H  | -3.251408 | -26.857344 | 43.571762 | H                      | -6.319866 | -18.581980 | 40.742710 |
| H  | -8.403930 | -20.000093 | 52.467075 | H                      | -6.744055 | -15.152913 | 43.295006 |
| H  | -9.260957 | -21.280184 | 52.328297 | H                      | -6.713554 | -20.073252 | 42.682610 |
| O  | -2.123156 | -24.691280 | 48.315128 | H                      | -7.133361 | -16.636606 | 45.227482 |
| H  | -0.948967 | -26.124752 | 48.344254 | H                      | -8.093537 | -18.423498 | 46.249092 |
| O  | -0.497488 | -26.982229 | 48.479271 | C                      | -5.862984 | -23.187992 | 54.834003 |
| H  | -0.732844 | -27.204781 | 49.389862 | C                      | -5.443818 | -23.218107 | 53.372280 |



|   |            |            |           |   |           |            |           |
|---|------------|------------|-----------|---|-----------|------------|-----------|
| N | -6.199289  | -22.607340 | 52.384464 | H | -8.293276 | -18.304640 | 51.019054 |
| C | -4.402616  | -23.816290 | 52.688652 | C | -1.026232 | -28.204679 | 53.040436 |
| C | -5.610321  | -22.849533 | 51.189968 | C | -1.118014 | -26.892967 | 52.337029 |
| N | -4.513294  | -23.582855 | 51.322491 | C | -0.223987 | -25.726027 | 52.398972 |
| H | -6.209713  | -22.190397 | 55.119522 | C | 1.049741  | -25.545485 | 53.154430 |
| H | -5.019159  | -23.458292 | 55.473240 | C | -2.175941 | -26.434067 | 51.412914 |
| H | -7.032394  | -22.011267 | 52.531635 | C | -3.243029 | -27.334965 | 51.048031 |
| H | -3.585727  | -24.398998 | 53.086506 | N | -2.014689 | -25.176851 | 50.934601 |
| H | -6.000602  | -22.483597 | 50.252804 | C | -0.861053 | -24.739950 | 51.486084 |
| C | -3.633001  | -26.329996 | 44.421001 | C | -0.262979 | -23.437019 | 51.229961 |
| C | -2.847402  | -26.752754 | 45.661762 | N | -4.388543 | -23.210159 | 48.185307 |
| C | -3.101834  | -28.211344 | 46.041908 | C | -4.392133 | -21.856989 | 47.991131 |
| O | -4.056514  | -28.856665 | 45.605286 | C | -5.585948 | -21.422016 | 47.270943 |
| N | -2.188288  | -28.745584 | 46.896049 | O | -8.349598 | -17.883793 | 47.056355 |
| H | -3.530738  | -25.255188 | 44.242535 | C | -8.033575 | -18.534004 | 48.166965 |
| H | -4.691622  | -26.576733 | 44.526062 | O | -8.232138 | -18.023436 | 49.259972 |
| H | -1.771541  | -26.608068 | 45.506844 | C | -7.466869 | -19.942657 | 48.008865 |
| H | -3.105071  | -26.126959 | 46.522572 | C | -6.131784 | -20.078810 | 47.233337 |
| H | -1.503840  | -28.166916 | 47.388992 | C | -6.312034 | -22.663988 | 46.927055 |
| H | -2.383929  | -29.675884 | 47.234516 | C | -7.564935 | -22.822216 | 46.130661 |
| C | -9.383001  | -17.371992 | 52.377991 | C | -5.436889 | -23.750025 | 47.445854 |
| O | -8.461504  | -18.386271 | 51.978439 | C | -5.749057 | -25.167978 | 47.409073 |
| H | -10.231761 | -17.826010 | 52.904541 | N | -2.058276 | -22.499458 | 49.815464 |
| H | -9.768519  | -16.829527 | 51.508511 | C | -0.865995 | -22.388000 | 50.438011 |

|   |           |            |           |    |           |            |           |
|---|-----------|------------|-----------|----|-----------|------------|-----------|
| C | -0.238009 | -21.044992 | 50.311996 | H  | -7.765653 | -21.926359 | 45.536762 |
| C | 1.071701  | -20.618063 | 50.884033 | H  | -8.438851 | -23.007498 | 46.770107 |
| C | -1.197995 | -20.294006 | 49.510017 | H  | -7.491166 | -23.670921 | 45.442192 |
| C | -1.151009 | -18.880302 | 49.038246 | H  | -6.536487 | -25.488197 | 46.739845 |
| C | -2.263015 | -21.284992 | 49.266979 | H  | 1.281737  | -19.573051 | 50.640942 |
| C | -3.405940 | -20.929003 | 48.466961 | H  | 1.900600  | -21.221245 | 50.494198 |
| N | -4.288565 | -25.908108 | 49.294163 | H  | -1.141591 | -18.817425 | 47.943424 |
| C | -4.166006 | -27.087011 | 49.946022 | H  | -0.251783 | -18.378307 | 49.404903 |
| C | -5.219987 | -26.140009 | 48.332973 | H  | -2.015775 | -18.304602 | 49.390202 |
| C | -5.778989 | -27.518003 | 48.344009 | H  | -3.500173 | -19.896624 | 48.158733 |
| C | -6.750659 | -28.114485 | 47.385117 | H  | -6.242925 | -28.359537 | 46.444031 |
| C | -5.044997 | -28.163992 | 49.439980 | H  | -7.587057 | -27.440575 | 47.170074 |
| C | -5.134032 | -29.564793 | 49.942642 | H  | -7.170517 | -29.041101 | 47.787231 |
| H | -0.122334 | -28.253363 | 53.653252 | H  | -5.292629 | -29.603695 | 51.027061 |
| H | -1.884403 | -28.372490 | 53.702679 | H  | -5.963203 | -30.093956 | 49.466042 |
| H | 0.995034  | -24.695616 | 53.845448 | Fe | -3.137620 | -24.224768 | 49.509346 |
| H | 1.897572  | -25.363779 | 52.482819 | O  | -8.411553 | -20.956945 | 52.828762 |
| H | 1.283237  | -26.435293 | 53.745232 | H  | -4.219666 | -30.131577 | 49.725658 |
| H | -3.259306 | -28.315477 | 51.504749 | H  | -3.251408 | -26.857344 | 43.571762 |
| H | 0.684054  | -23.223188 | 51.708893 | H  | -8.397310 | -20.002220 | 52.570347 |
| H | -7.327822 | -20.332178 | 49.022282 | H  | -9.268989 | -21.282213 | 52.532047 |
| H | -8.237830 | -20.557869 | 47.529617 | O  | -2.134896 | -24.682333 | 48.319420 |
| H | -6.560938 | -19.680721 | 45.931465 | H  | -0.936421 | -26.106493 | 48.331390 |
| H | -5.418435 | -19.300339 | 47.515038 | O  | -0.472847 | -26.957762 | 48.460716 |

|              |           |            |           |   |            |            |           |
|--------------|-----------|------------|-----------|---|------------|------------|-----------|
| H            | -0.690816 | -27.183636 | 49.374619 | C | -5.442427  | -23.215881 | 53.372772 |
| H            | -0.991963 | -29.044773 | 52.336468 | N | -6.188438  | -22.591640 | 52.385944 |
| H            | -8.909710 | -16.675373 | 53.038010 | C | -4.406383  | -23.822285 | 52.688549 |
| H            | -5.355939 | -16.134195 | 40.210564 | C | -5.598612  | -22.834553 | 51.191750 |
| H            | -6.656253 | -23.884270 | 55.009735 | N | -4.510933  | -23.580770 | 51.323631 |
| H            | 1.087446  | -20.711859 | 51.976788 | H | -6.208330  | -22.190437 | 55.121601 |
|              |           |            |           | H | -5.019419  | -23.459604 | 55.473122 |
| <b>2INT3</b> |           |            |           | H | -7.017797  | -21.991465 | 52.528580 |
| C            | -6.283006 | -15.849997 | 40.663006 | H | -3.596699  | -24.415962 | 53.084946 |
| C            | -6.622902 | -16.833143 | 41.753277 | H | -5.979914  | -22.456627 | 50.255714 |
| C            | -7.945639 | -17.060759 | 42.153034 | C | -3.633001  | -26.329996 | 44.421005 |
| C            | -5.604271 | -17.540443 | 42.402153 | C | -2.855177  | -26.762465 | 45.663212 |
| C            | -8.245613 | -17.949917 | 43.180901 | C | -3.114370  | -28.223352 | 46.031063 |
| C            | -5.883224 | -18.433872 | 43.434406 | O | -4.066167  | -28.864286 | 45.581612 |
| C            | -7.207222 | -18.624994 | 43.821690 | N | -2.207535  | -28.764616 | 46.887878 |
| O            | -7.549679 | -19.461164 | 44.870659 | H | -3.522981  | -25.255186 | 44.246841 |
| H            | -6.170840 | -14.831463 | 41.055023 | H | -4.693637  | -26.569948 | 44.521057 |
| H            | -7.053759 | -15.818941 | 39.886929 | H | -1.778170  | -26.618773 | 45.515373 |
| H            | -8.754804 | -16.532686 | 41.655254 | H | -3.116873  | -26.142214 | 46.526703 |
| H            | -4.571415 | -17.389959 | 42.098900 | H | -1.529626  | -28.187969 | 47.392738 |
| H            | -9.269792 | -18.125187 | 43.494595 | H | -2.410328  | -29.694817 | 47.222488 |
| H            | -5.081354 | -18.972771 | 43.932827 | C | -9.383001  | -17.371994 | 52.377991 |
| H            | -8.090668 | -18.382345 | 46.148552 | O | -8.443744  | -18.346060 | 51.921478 |
| C            | -5.862984 | -23.187992 | 54.834003 | H | -10.196401 | -17.867125 | 52.922760 |

|   |           |            |           |   |           |            |           |
|---|-----------|------------|-----------|---|-----------|------------|-----------|
| H | -9.818863 | -16.820541 | 51.538242 | C | -0.865988 | -22.388004 | 50.438015 |
| H | -8.320494 | -18.257132 | 50.957825 | C | -0.238015 | -21.044989 | 50.311993 |
| C | -1.026739 | -28.204355 | 53.041496 | C | 1.071690  | -20.617371 | 50.884068 |
| C | -1.118010 | -26.892960 | 52.337029 | C | -1.197991 | -20.294012 | 49.510021 |
| C | -0.223992 | -25.726032 | 52.398972 | C | -1.150867 | -18.879705 | 49.039452 |
| C | 1.050101  | -25.546206 | 53.154484 | C | -2.263018 | -21.284986 | 49.266975 |
| C | -2.175945 | -26.434074 | 51.412918 | C | -3.405935 | -20.929007 | 48.466953 |
| C | -3.243029 | -27.334961 | 51.048027 | N | -4.289013 | -25.907684 | 49.292301 |
| N | -2.014580 | -25.178057 | 50.933815 | C | -4.166003 | -27.087015 | 49.946026 |
| C | -0.861046 | -24.739944 | 51.486088 | C | -5.219992 | -26.140009 | 48.332970 |
| C | -0.262984 | -23.437021 | 51.229958 | C | -5.778984 | -27.518005 | 48.344017 |
| N | -4.387621 | -23.209806 | 48.181347 | C | -6.751010 | -28.114599 | 47.385063 |
| C | -4.392139 | -21.856989 | 47.991142 | C | -5.045001 | -28.163986 | 49.439976 |
| C | -5.585950 | -21.422012 | 47.270943 | C | -5.134350 | -29.565075 | 49.942062 |
| O | -8.253365 | -17.821480 | 46.942219 | H | -0.120992 | -28.254185 | 53.651676 |
| C | -8.055319 | -18.533039 | 48.051147 | H | -1.882968 | -28.370451 | 53.706814 |
| O | -8.249970 | -18.029207 | 49.144173 | H | 0.995601  | -24.698259 | 53.847977 |
| C | -7.592240 | -19.974293 | 47.860413 | H | 1.897918  | -25.362492 | 52.483349 |
| C | -6.148089 | -20.127720 | 47.395905 | H | 1.284455  | -26.437422 | 53.743031 |
| C | -6.312028 | -22.663990 | 46.927048 | H | -3.259496 | -28.315607 | 51.504551 |
| C | -7.574586 | -22.852104 | 46.150745 | H | 0.683853  | -23.223097 | 51.709385 |
| C | -5.436892 | -23.750027 | 47.445854 | H | -7.693779 | -20.459337 | 48.840069 |
| C | -5.749054 | -25.167976 | 47.409077 | H | -8.293337 | -20.479971 | 47.186874 |
| N | -2.058221 | -22.499100 | 49.814747 | H | -6.747353 | -19.805805 | 45.313362 |

|    |           |            |           |              |           |            |           |
|----|-----------|------------|-----------|--------------|-----------|------------|-----------|
| H  | -5.485678 | -19.312939 | 47.679386 | O            | -0.505205 | -26.982922 | 48.468182 |
| H  | -7.762957 | -22.016626 | 45.470486 | H            | -0.731705 | -27.203865 | 49.381359 |
| H  | -8.453207 | -22.950661 | 46.803513 | H            | -0.996026 | -29.045509 | 52.338551 |
| H  | -7.528947 | -23.762222 | 45.544117 | H            | -8.909710 | -16.675371 | 53.038013 |
| H  | -6.537876 | -25.489258 | 46.742256 | H            | -5.355938 | -16.134199 | 40.210560 |
| H  | 1.280004  | -19.571251 | 50.643684 | H            | -6.656254 | -23.884270 | 55.009739 |
| H  | 1.901548  | -21.217955 | 50.492157 | H            | 1.088860  | -20.713976 | 51.976574 |
| H  | -1.136472 | -18.814995 | 47.944592 |              |           |            |           |
| H  | -0.253717 | -18.376797 | 49.410282 | <b>6INT4</b> |           |            |           |
| H  | -2.017512 | -18.304661 | 49.388187 | C            | -6.283009 | -15.849996 | 40.663010 |
| H  | -3.497383 | -19.896540 | 48.158051 | C            | -6.102869 | -16.114941 | 42.151585 |
| H  | -6.245186 | -28.359751 | 46.442982 | C            | -4.820415 | -16.422138 | 42.633938 |
| H  | -7.588009 | -27.440859 | 47.171055 | C            | -7.143392 | -16.084091 | 43.089512 |
| H  | -7.170748 | -29.041349 | 47.787350 | C            | -4.578503 | -16.692671 | 43.976051 |
| H  | -5.286288 | -29.604561 | 51.027401 | C            | -6.920813 | -16.352682 | 44.445274 |
| H  | -5.967740 | -30.092058 | 49.470181 | C            | -5.630537 | -16.667521 | 44.900269 |
| Fe | -3.133790 | -24.227016 | 49.506760 | O            | -5.327642 | -16.961220 | 46.193085 |
| O  | -8.406547 | -20.923859 | 52.770576 | H            | -6.479179 | -14.794191 | 40.443150 |
| H  | -4.222674 | -30.134043 | 49.719269 | H            | -7.094168 | -16.441826 | 40.226341 |
| H  | -3.251407 | -26.857344 | 43.571762 | H            | -3.986316 | -16.455400 | 41.936111 |
| H  | -8.385755 | -19.972996 | 52.501976 | H            | -8.154355 | -15.847946 | 42.763786 |
| H  | -9.261613 | -21.251753 | 52.470337 | H            | -3.580522 | -16.932762 | 44.329571 |
| O  | -2.130468 | -24.683731 | 48.317097 | H            | -7.743744 | -16.310921 | 45.154873 |
| H  | -0.959525 | -26.127069 | 48.334713 | H            | -1.520157 | -24.063820 | 47.559258 |

|   |           |            |           |   |            |            |           |
|---|-----------|------------|-----------|---|------------|------------|-----------|
| C | -5.862981 | -23.187988 | 54.834000 | H | -10.148732 | -17.926468 | 52.936520 |
| C | -5.470564 | -23.168402 | 53.376282 | H | -9.878279  | -16.807972 | 51.580200 |
| N | -6.191807 | -22.474136 | 52.421741 | H | -8.474913  | -18.369146 | 50.883236 |
| C | -4.465160 | -23.793591 | 52.669186 | C | -1.018768  | -28.205025 | 53.037868 |
| C | -5.615386 | -22.699171 | 51.217442 | C | -1.118002  | -26.892946 | 52.337032 |
| N | -4.562238 | -23.498793 | 51.318645 | C | -0.224000  | -25.726044 | 52.398972 |
| H | -6.195115 | -22.199987 | 55.167271 | C | 1.050079   | -25.550402 | 53.154709 |
| H | -5.009282 | -23.485863 | 55.448307 | C | -2.175963  | -26.434084 | 51.412926 |
| H | -7.007625 | -21.854771 | 52.583363 | C | -3.243028  | -27.334951 | 51.048019 |
| H | -3.681947 | -24.435013 | 53.044624 | N | -2.007152  | -25.185390 | 50.947533 |
| H | -5.984412 | -22.258318 | 50.303604 | C | -0.861029  | -24.739941 | 51.486073 |
| C | -3.633008 | -26.329996 | 44.421021 | C | -0.262996  | -23.437017 | 51.229969 |
| C | -2.848944 | -26.786558 | 45.650703 | N | -4.377913  | -23.196430 | 48.141129 |
| C | -3.143633 | -28.239285 | 46.023880 | C | -4.392131  | -21.856991 | 47.991146 |
| O | -4.117491 | -28.855293 | 45.584923 | C | -5.585958  | -21.422009 | 47.270939 |
| N | -2.245426 | -28.801033 | 46.874512 | O | -7.215193  | -17.456747 | 48.069202 |
| H | -3.512399 | -25.255367 | 44.252159 | C | -7.642616  | -18.602919 | 48.221340 |
| H | -4.695031 | -26.563229 | 44.520790 | O | -8.269730  | -19.200232 | 49.094875 |
| H | -1.770926 | -26.682411 | 45.477608 | C | -7.306745  | -19.618683 | 46.827595 |
| H | -3.058417 | -26.157740 | 46.520969 | C | -5.975188  | -20.103500 | 47.023975 |
| H | -1.529609 | -28.247711 | 47.356312 | C | -6.312024  | -22.663986 | 46.927063 |
| H | -2.453363 | -29.735439 | 47.193539 | C | -7.564607  | -22.849539 | 46.142338 |
| C | -9.382989 | -17.372015 | 52.377995 | C | -5.436894  | -23.750032 | 47.445839 |
| O | -8.393882 | -18.262461 | 51.852272 | C | -5.749057  | -25.167974 | 47.409088 |

|   |           |            |           |    |           |            |           |
|---|-----------|------------|-----------|----|-----------|------------|-----------|
| N | -2.041096 | -22.491695 | 49.802921 | H  | -6.114959 | -16.977427 | 46.786278 |
| C | -0.865971 | -22.388018 | 50.438007 | H  | -5.209750 | -19.327841 | 47.048206 |
| C | -0.238026 | -21.044979 | 50.311989 | H  | -7.644969 | -22.110666 | 45.339142 |
| C | 1.066793  | -20.611277 | 50.889908 | H  | -8.455697 | -22.739920 | 46.773758 |
| C | -1.197983 | -20.294018 | 49.510036 | H  | -7.605189 | -23.844795 | 45.692314 |
| C | -1.153663 | -18.877325 | 49.047821 | H  | -6.542415 | -25.489983 | 46.748898 |
| C | -2.263035 | -21.284981 | 49.266968 | H  | 1.283722  | -19.571831 | 50.630505 |
| C | -3.405930 | -20.929010 | 48.466953 | H  | 1.897778  | -21.224993 | 50.521713 |
| N | -4.285893 | -25.925348 | 49.284328 | H  | -1.163284 | -18.806274 | 47.953747 |
| C | -4.165989 | -27.087027 | 49.946030 | H  | -0.248493 | -18.378675 | 49.403572 |
| C | -5.219990 | -26.140005 | 48.332951 | H  | -2.013089 | -18.304335 | 49.415962 |
| C | -5.778983 | -27.518009 | 48.344032 | H  | -3.508573 | -19.892212 | 48.177856 |
| C | -6.754186 | -28.118015 | 47.391827 | H  | -6.243014 | -28.379047 | 46.456650 |
| C | -5.045009 | -28.163979 | 49.439964 | H  | -7.582867 | -27.438696 | 47.164787 |
| C | -5.137553 | -29.565933 | 49.938118 | H  | -7.184643 | -29.035231 | 47.803917 |
| H | -0.121193 | -28.247734 | 53.660084 | H  | -5.276164 | -29.607483 | 51.024967 |
| H | -1.882689 | -28.382837 | 53.689850 | H  | -5.979055 | -30.087475 | 49.475082 |
| H | 0.999128  | -24.696609 | 53.841122 | Fe | -3.092763 | -24.246412 | 49.449181 |
| H | 1.899075  | -25.376213 | 52.482513 | O  | -8.417562 | -20.819426 | 52.766827 |
| H | 1.279276  | -26.438078 | 53.750149 | H  | -4.231236 | -30.137772 | 49.701569 |
| H | -3.259708 | -28.315088 | 51.505005 | H  | -3.251399 | -26.857344 | 43.571747 |
| H | 0.679403  | -23.219730 | 51.715847 | H  | -8.325947 | -19.874079 | 52.487583 |
| H | -8.088873 | -20.370455 | 46.789509 | H  | -9.133904 | -21.156857 | 52.215321 |
| H | -7.391785 | -18.870764 | 46.039135 | O  | -1.890845 | -24.782833 | 48.088215 |

|             |           |            |           |   |           |            |           |
|-------------|-----------|------------|-----------|---|-----------|------------|-----------|
| H           | -0.894573 | -26.210190 | 48.205708 | H | -1.509462 | -24.064199 | 47.565098 |
| O           | -0.438290 | -27.072466 | 48.357830 | C | -5.862979 | -23.187990 | 54.834003 |
| H           | -0.628981 | -27.261108 | 49.285572 | C | -5.469215 | -23.170412 | 53.376839 |
| H           | -0.969497 | -29.041929 | 52.330990 | N | -6.191095 | -22.475821 | 52.423046 |
| H           | -8.909718 | -16.675352 | 53.038010 | C | -4.465015 | -23.796129 | 52.668808 |
| H           | -5.355934 | -16.134199 | 40.210560 | C | -5.615914 | -22.701010 | 51.217785 |
| H           | -6.656260 | -23.884274 | 55.009739 | N | -4.563326 | -23.500984 | 51.318512 |
| H           | 1.068573  | -20.685131 | 51.984280 | H | -6.196643 | -22.199621 | 55.164658 |
|             |           |            |           | H | -5.010107 | -23.484297 | 55.450199 |
| <b>6TS4</b> |           |            |           | H | -7.003959 | -21.856461 | 52.592724 |
| C           | -6.283009 | -15.849996 | 40.663006 | H | -3.681758 | -24.438232 | 53.042950 |
| C           | -6.098613 | -16.103153 | 42.152554 | H | -5.984862 | -22.260529 | 50.303654 |
| C           | -4.815014 | -16.408030 | 42.633263 | C | -3.633002 | -26.329994 | 44.421005 |
| C           | -7.136868 | -16.063995 | 43.092339 | C | -2.850792 | -26.786076 | 45.651974 |
| C           | -4.569740 | -16.669788 | 43.976448 | C | -3.142831 | -28.239780 | 46.022778 |
| C           | -6.910856 | -16.323627 | 44.449146 | O | -4.115463 | -28.856901 | 45.582630 |
| C           | -5.620035 | -16.637300 | 44.901546 | N | -2.244034 | -28.801443 | 46.872971 |
| O           | -5.314455 | -16.924900 | 46.196644 | H | -3.512155 | -25.255344 | 44.252415 |
| H           | -6.483749 | -14.796652 | 40.435818 | H | -4.695223 | -26.562735 | 44.520000 |
| H           | -7.092867 | -16.448217 | 40.232731 | H | -1.772596 | -26.678019 | 45.482773 |
| H           | -3.983033 | -16.447084 | 41.933346 | H | -3.065801 | -26.159065 | 46.522118 |
| H           | -8.148295 | -15.829056 | 42.767410 | H | -1.529735 | -28.248137 | 47.356838 |
| H           | -3.571419 | -16.909107 | 44.329342 | H | -2.452432 | -29.735655 | 47.192295 |
| H           | -7.732331 | -16.276791 | 45.160210 | C | -9.383001 | -17.371998 | 52.377987 |



|   |            |            |           |   |           |            |           |
|---|------------|------------|-----------|---|-----------|------------|-----------|
| O | -8.399080  | -18.282156 | 51.876770 | C | -5.749049 | -25.167976 | 47.409081 |
| H | -10.165783 | -17.908613 | 52.930210 | N | -2.040980 | -22.491791 | 49.802597 |
| H | -9.857165  | -16.808945 | 51.566830 | C | -0.865978 | -22.388008 | 50.438023 |
| H | -8.476342  | -18.401726 | 50.910694 | C | -0.238023 | -21.044983 | 50.311981 |
| C | -1.018883  | -28.204958 | 53.038208 | C | 1.066864  | -20.611160 | 50.889915 |
| C | -1.118003  | -26.892948 | 52.337029 | C | -1.197986 | -20.294018 | 49.510036 |
| C | -0.224001  | -25.726042 | 52.398968 | C | -1.153015 | -18.877308 | 49.047539 |
| C | 1.050150   | -25.550604 | 53.154804 | C | -2.263027 | -21.284979 | 49.266968 |
| C | -2.175952  | -26.434088 | 51.412918 | C | -3.405918 | -20.929016 | 48.466934 |
| C | -3.243027  | -27.334951 | 51.048019 | N | -4.285775 | -25.925423 | 49.283562 |
| N | -2.007173  | -25.185575 | 50.947273 | C | -4.166000 | -27.087023 | 49.946037 |
| C | -0.861036  | -24.739939 | 51.486084 | C | -5.219997 | -26.140007 | 48.332954 |
| C | -0.262992  | -23.437021 | 51.229958 | C | -5.778976 | -27.518011 | 48.344028 |
| N | -4.377530  | -23.198475 | 48.139648 | C | -6.755362 | -28.117516 | 47.392529 |
| C | -4.392162  | -21.856977 | 47.991184 | C | -5.045008 | -28.163980 | 49.439964 |
| C | -5.585942  | -21.422018 | 47.270924 | C | -5.137856 | -29.565788 | 49.938614 |
| O | -7.224323  | -17.445726 | 48.084034 | H | -0.119894 | -28.248600 | 53.658394 |
| C | -7.631863  | -18.589317 | 48.250389 | H | -1.881452 | -28.381559 | 53.692364 |
| O | -8.238253  | -19.226049 | 49.100826 | H | 0.998964  | -24.697760 | 53.842426 |
| C | -7.281209  | -19.617090 | 46.778355 | H | 1.899046  | -25.375072 | 52.482819 |
| C | -5.965011  | -20.100836 | 46.991009 | H | 1.279958  | -26.438953 | 53.749084 |
| C | -6.312026  | -22.663988 | 46.927055 | H | -3.259836 | -28.315132 | 51.504963 |
| C | -7.564122  | -22.849726 | 46.141232 | H | 0.679354  | -23.219687 | 51.716003 |
| C | -5.436894  | -23.750029 | 47.445847 | H | -8.079508 | -20.350889 | 46.741699 |

|    |           |            |           |            |           |            |           |
|----|-----------|------------|-----------|------------|-----------|------------|-----------|
| H  | -7.368441 | -18.828913 | 46.033417 | O          | -1.886736 | -24.785303 | 48.086502 |
| H  | -6.101183 | -16.934769 | 46.784431 | H          | -0.890583 | -26.211378 | 48.215706 |
| H  | -5.189840 | -19.334356 | 46.990719 | O          | -0.438016 | -27.075972 | 48.365837 |
| H  | -7.642225 | -22.112061 | 45.336452 | H          | -0.630762 | -27.266388 | 49.292816 |
| H  | -8.456351 | -22.738094 | 46.770683 | H          | -0.972315 | -29.042330 | 52.331688 |
| H  | -7.605261 | -23.845602 | 45.692543 | H          | -8.909710 | -16.675367 | 53.038013 |
| H  | -6.543682 | -25.489906 | 46.750309 | H          | -5.355935 | -16.134199 | 40.210560 |
| H  | 1.284295  | -19.571968 | 50.629677 | H          | -6.656259 | -23.884272 | 55.009739 |
| H  | 1.897863  | -21.225384 | 50.522568 | H          | 1.068515  | -20.684019 | 51.984379 |
| H  | -1.162344 | -18.806232 | 47.953442 |            |           |            |           |
| H  | -0.247623 | -18.378983 | 49.403351 | <b>PRO</b> |           |            |           |
| H  | -2.012087 | -18.303577 | 49.415489 | C          | -6.283012 | -15.849995 | 40.656811 |
| H  | -3.510008 | -19.891855 | 48.179203 | C          | -6.137535 | -15.983811 | 42.157452 |
| H  | -6.247429 | -28.375034 | 46.454670 | C          | -4.940980 | -16.461170 | 42.710861 |
| H  | -7.586219 | -27.439199 | 47.170132 | C          | -7.170590 | -15.648106 | 43.041012 |
| H  | -7.182817 | -29.036793 | 47.803234 | C          | -4.772830 | -16.607552 | 44.085060 |
| H  | -5.281031 | -29.606833 | 51.024933 | C          | -7.021275 | -15.788290 | 44.421509 |
| H  | -5.976656 | -30.088820 | 49.472313 | C          | -5.818453 | -16.273027 | 44.947697 |
| Fe | -3.091348 | -24.247646 | 49.444698 | O          | -5.611821 | -16.449373 | 46.291553 |
| O  | -8.410883 | -20.824282 | 52.852543 | H          | -6.530154 | -14.825073 | 40.357456 |
| H  | -4.229761 | -30.136633 | 49.706528 | H          | -7.068251 | -16.504580 | 40.260979 |
| H  | -3.251406 | -26.857346 | 43.571758 | H          | -4.119659 | -16.728235 | 42.050274 |
| H  | -8.330500 | -19.885908 | 52.551220 | H          | -8.112364 | -15.271036 | 42.648769 |
| H  | -9.161183 | -21.169437 | 52.353664 | H          | -3.843577 | -16.981180 | 44.502712 |

|   |           |            |           |   |            |            |           |
|---|-----------|------------|-----------|---|------------|------------|-----------|
| H | -7.837893 | -15.521389 | 45.089031 | C | -9.401601  | -17.347198 | 52.421379 |
| H | -1.572686 | -24.115982 | 47.470997 | O | -8.437572  | -18.323322 | 52.023022 |
| C | -5.862976 | -23.187986 | 54.840202 | H | -10.227912 | -17.795218 | 52.989651 |
| C | -5.460055 | -23.188150 | 53.388226 | H | -9.824129  | -16.827114 | 51.553867 |
| N | -6.199670 | -22.519688 | 52.428810 | H | -8.716529  | -18.694178 | 51.175179 |
| C | -4.451546 | -23.807465 | 52.683083 | C | -1.013605  | -28.204519 | 53.039471 |
| C | -5.625181 | -22.751387 | 51.220757 | C | -1.117995  | -26.892933 | 52.337029 |
| N | -4.562685 | -23.530943 | 51.331562 | C | -0.224012  | -25.719854 | 52.398968 |
| H | -6.214116 | -22.198643 | 55.149887 | C | 1.051231   | -25.549686 | 53.156357 |
| H | -5.013979 | -23.466127 | 55.469879 | C | -2.169761  | -26.434105 | 51.419121 |
| H | -6.989414 | -21.898314 | 52.634743 | C | -3.243025  | -27.341141 | 51.048012 |
| H | -3.656499 | -24.434597 | 53.057865 | N | -2.002152  | -25.188887 | 50.948666 |
| H | -5.999945 | -22.337576 | 50.296246 | C | -0.854822  | -24.739927 | 51.492287 |
| C | -3.626803 | -26.329994 | 44.421009 | C | -0.263003  | -23.437025 | 51.229954 |
| C | -2.882351 | -26.820307 | 45.661804 | N | -4.370896  | -23.218359 | 48.152866 |
| C | -3.174612 | -28.286160 | 45.980526 | C | -4.416952  | -21.856972 | 48.009777 |
| O | -4.139039 | -28.892166 | 45.507725 | C | -5.592164  | -21.453022 | 47.270943 |
| N | -2.283856 | -28.869457 | 46.824936 | O | -8.149247  | -16.541389 | 47.969402 |
| H | -3.537871 | -25.244818 | 44.310181 | C | -8.616395  | -17.445015 | 48.543770 |
| H | -4.682965 | -26.603123 | 44.463486 | O | -9.112151  | -18.324654 | 49.134171 |
| H | -1.800174 | -26.696655 | 45.535851 | C | -7.142770  | -19.622585 | 46.528828 |
| H | -3.135867 | -26.224083 | 46.542679 | C | -5.941410  | -20.083250 | 46.922848 |
| H | -1.589722 | -28.319550 | 47.342735 | C | -6.293409  | -22.645388 | 46.914650 |
| H | -2.504785 | -29.805616 | 47.130108 | C | -7.525232  | -22.828146 | 46.094929 |

|   |           |            |           |   |           |            |           |
|---|-----------|------------|-----------|---|-----------|------------|-----------|
| C | -5.412100 | -23.768627 | 47.458229 | H | 1.007300  | -24.693375 | 53.840500 |
| C | -5.742844 | -25.167974 | 47.415295 | H | 1.903502  | -25.384464 | 52.485695 |
| N | -2.044359 | -22.489958 | 49.802639 | H | 1.273931  | -26.436932 | 53.755596 |
| C | -0.865964 | -22.388012 | 50.438030 | H | -3.257212 | -28.320053 | 51.508675 |
| C | -0.238035 | -21.051176 | 50.311970 | H | 0.680131  | -23.216291 | 51.714146 |
| C | 1.067983  | -20.610508 | 50.882988 | H | -8.026242 | -20.248087 | 46.474407 |
| C | -1.210377 | -20.294027 | 49.503845 | H | -7.246701 | -18.589310 | 46.216824 |
| C | -1.159611 | -18.878084 | 49.037819 | H | -6.403057 | -16.179016 | 46.775822 |
| C | -2.269236 | -21.284966 | 49.266960 | H | -5.132988 | -19.354813 | 46.960751 |
| C | -3.430714 | -20.935225 | 48.473137 | H | -7.555225 | -22.110849 | 45.266815 |
| N | -4.279009 | -25.935116 | 49.282509 | H | -8.440598 | -22.678038 | 46.683517 |
| C | -4.159796 | -27.099434 | 49.952248 | H | -7.576276 | -23.835245 | 45.672241 |
| C | -5.213810 | -26.146206 | 48.339146 | H | -6.548417 | -25.479738 | 46.764893 |
| C | -5.778965 | -27.518017 | 48.350243 | H | 1.275143  | -19.567316 | 50.628342 |
| C | -6.758981 | -28.114054 | 47.398727 | H | 1.902431  | -21.213978 | 50.505054 |
| C | -5.045015 | -28.170170 | 49.446152 | H | -1.153576 | -18.807890 | 47.943184 |
| C | -5.143239 | -29.573294 | 49.940502 | H | -0.258291 | -18.378742 | 49.404026 |
| H | -0.117161 | -28.241646 | 53.664375 |   |           |            |           |
| H | -1.877454 | -28.389250 | 53.690117 |   |           |            |           |
| H | -2.022134 | -18.300261 | 49.392700 |   |           |            |           |
| H | -3.540839 | -19.895901 | 48.195259 |   |           |            |           |
| H | -6.258690 | -28.371902 | 46.456852 |   |           |            |           |
| H | -7.589081 | -27.433044 | 47.180199 |   |           |            |           |
| H | -7.188292 | -29.033209 | 47.808945 |   |           |            |           |

|    |           |            |           |            |           |
|----|-----------|------------|-----------|------------|-----------|
| H  | -5.263661 | -29.618078 | 51.029564 |            |           |
| H  | -5.997303 | -30.085747 | 49.489574 |            |           |
| Fe | -3.067407 | -24.261772 | 49.417545 |            |           |
| O  | -8.201240 | -20.745556 | 53.385933 |            |           |
| H  | -4.246277 | -30.153509 | 49.688042 |            |           |
| H  | -3.189405 | -26.801546 | 43.559357 |            |           |
| H  | -8.217190 | -19.836946 | 53.019661 |            |           |
| H  | -9.122797 | -21.026354 | 53.421288 |            |           |
| O  | -1.850769 | -24.813438 | 48.079063 |            |           |
| H  | -0.907994 | -26.278755 | 48.202751 |            |           |
| O  | -0.521411 | -27.168447 | 48.387329 |            |           |
| H  | -0.797512 | -27.333408 | 49.298573 |            |           |
| H  | -0.956327 | -29.042747 | 52.334377 |            |           |
| H  | -8.909709 | -16.619566 | 53.038021 |            |           |
| H  | -5.355932 | -16.121801 | 40.198158 |            |           |
| H  | -6.650062 | -23.890474 | 55.015938 |            |           |
| H  |           | 1.081305   |           | -20.690519 | 51.977139 |
